# Supplementary material
Source: PubMed Central journal article supplement (PMC11251822)
Supplement: NIHMS2008403-supplement-Online_Supplement.pdf [file NIHMS2008403-supplement-Online_Supplement.pdf]

Supplemental Materials:  
INDIVIDUAL DIFFERENCES IN SPEECH PERCEPTION FLEXIBILITY

**Idiosyncratic use of bottom-up and top-down information leads to differences in speech perception flexibility: Converging evidence from ERPs and eye-tracking**

**ONLINE SUPPLEMENTAL MATERIALS**

Efthymia C. Kapnoula  
Dept. of Psychological and Brain Sciences  
DeLTA Center  
University of Iowa  
Basque Center on Cognition, Brain and Language

and

Bob McMurray  
Dept. of Psychological and Brain Sciences  
Dept. of Communication Sciences and Disorders  
Dept. of Linguistics  
DeLTA Center  
University of Iowa

Supplemental Materials:  
 INDIVIDUAL DIFFERENCES IN SPEECH PERCEPTION FLEXIBILITY

**S1. VAS task results: Hierarchical regression results**

Table S1.1 Results of hierarchical regression analyses predicting *raw* (left side) and *residualized* (right side) VAS slopes as a function of place of articulation (PoA) and secondary cue use ( $\theta$  angle).

| Step | Variable       | DV: VAS slope |              |        | DV: Residualized VAS slope |              |      |
|------|----------------|---------------|--------------|--------|----------------------------|--------------|------|
|      |                | $\beta$       | $\Delta R^2$ | $p$    | $\beta$                    | $\Delta R^2$ | $p$  |
| 1    | PoA            | -0.328        | 0.107        | < .001 | -0.023                     | <0.001       | .792 |
| 2    | PoA            | -0.150        |              | .156   | 0.181                      |              |      |
| 2    | $\theta$ angle | 0.277         |              | .010   | 0.318                      |              |      |
|      |                |               | 0.045        | < .001 |                            | 0.060        | .018 |

**S2. Identification (mouse-clicking) results in the lexical gradiency VWP task**

While the primary measure in the VWP Gradiency task was based on the fixations, we also examined the mouse-clicking responses to establish the expected patterns of effects. This analysis examined the likelihood of participants clicking on the picture of the unvoiced word in a pair (*likelihood of unvoiced response* or *LUR*). We fitted a logistic mixed effects model using the *glmer* function in R, with VOT,  $F_0$ , and place of articulation (PoA), and their interactions as fixed effects. VOT and  $F_0$  were centered and PoA was effect-coded (alveolar = 1; labial = -1). The random effects included a random slope of VOT, PoA, and their interaction for subjects (see Equation 1, Table S2.1 for results).

$$\text{LUR} \sim \text{VOT} * \text{F}_0 * \text{PoA} + (\text{VOT} * \text{PoA} | \text{subject}), \text{family} = \text{binomial} \quad (1)$$

There was a significant main effect of VOT,  $p < .001$ , with greater VOT predicting higher LUR, as expected. There was also a main effect of  $F_0$ ,  $p < .001$ , in the expected direction; higher  $F_0$  predicted higher likelihood of unvoiced classification. PoA was also significant,  $p < .001$ , with participants being more likely to give an unvoiced response for labial stimuli. The  $\text{VOT} \times \text{F}_0$  interaction was significant,  $p < .001$ , as was the three-way interaction,  $p < .001$ , showing a stronger  $F_0$  effect for labial stimuli with low VOTs (see Figure S2.1). Because of the significant effects of secondary variables (PoA and  $F_0$ ), we did not collapse across these in subsequent analyses of the fixations.

Table S2.1 *Likelihood of unvoiced response as predicted by VOT,  $F_0$ , and place of articulation*

|                                        | <i>Estimate</i> | <i>S.E.</i> | <i>z</i> | <i>p</i> |
|----------------------------------------|-----------------|-------------|----------|----------|
| (Intercept)                            | 1.252           | .092        | 13.623   | < .001   |
| VOT                                    | 1.927           | .055        | 35.156   | < .001   |
| $F_0$                                  | .243            | .056        | 4.321    | < .001   |
| PoA                                    | -1.029          | .065        | -15.930  | < .001   |
| $\text{VOT} * \text{F}_0$              | -.198           | .042        | -4.741   | < .001   |
| $\text{VOT} * \text{PoA}$              | .023            | .036        | .651     | .515     |
| $\text{F}_0 * \text{PoA}$              | .002            | .056        | .028     | .978     |
| $\text{VOT} * \text{F}_0 * \text{PoA}$ | .154            | .042        | 3.688    | < .001   |

Supplemental Materials:  
INDIVIDUAL DIFFERENCES IN SPEECH PERCEPTION FLEXIBILITY

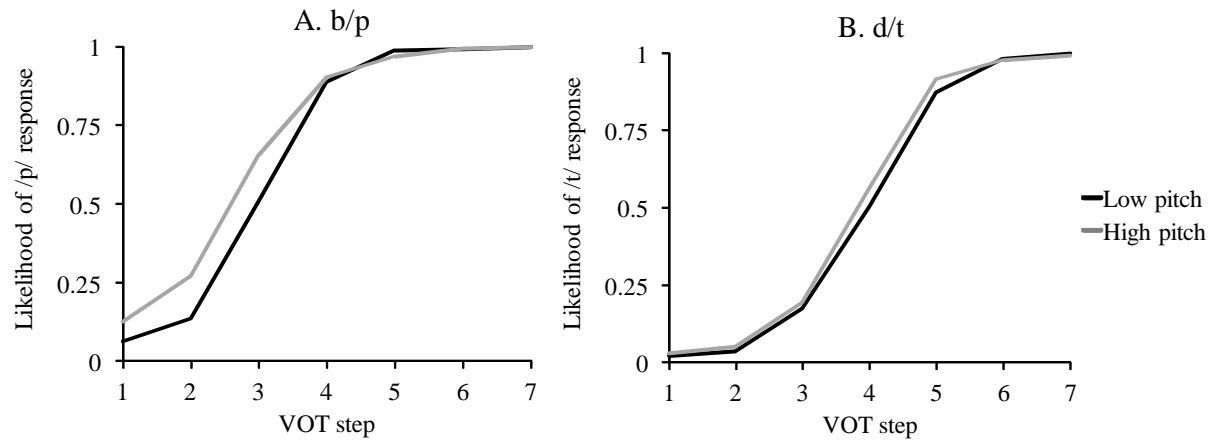

Figure S2.1. Likelihood of "unvoiced" response as a function of VOT and F<sub>0</sub> (pitch) for the A) b/p continuum and B) for the d/t continuum.

### S3. Computation of rVOT

Analysis of the VWP and P3 data needed to account for variation in listeners' own category boundaries to ensure that the gradient effects were truly within-category. For example, a VOT of 20 ms might be a /b/ for some subjects, but a /p/ for others. Consequently, even if there was a perfectly discrete boundary (that varied between subjects), one could see enhanced competitor fixations at 20 ms, because some subjects perceived this as a /p/, while others heard it as a /b/. The same averaging logic also applies to items; for example, *beach/peach* could have a different boundary than *bowl/pole* due to coarticulation. To account for this, we used two techniques based on McMurray et al. (2016).

First, we computed a measure of *relative VOT* (rVOT) that reflected the category boundary for that subject and continuum. Here, -1 was one step to the left of the boundary – regardless of where that subject's boundary is located, -2 was two steps (etc). To accomplish this, we fit a four-parameter logistic to each participant's identification curve (based on the mouse click response). We then used the crossover parameter as an estimate of category boundary. We did this for each place of articulation and  $F_0$  value separately, yielding four crossovers per participant. Fits were performed using a constrained gradient descent method implemented in Matlab (McMurray, 2017). We then did this for each continuum (collapsed over subject<sup>1</sup>). Next, we computed the estimated crossover on each trial by first computing the deviation of each item-specific crossover from the average crossover; next we added that deviation to the subject-specific crossover. As a result for each participant, we had an estimated category boundary that accounted for the effects of place of articulation,  $F_0$ , and item (see McMurray et al., 2016, for a similar procedure). We used this boundary estimate to calculate the distance between the participant's category boundary and the actual VOT step on each trial, (henceforth, *relative VOT* or *rVOT*; see also Kapnoula et al., 2021; McMurray et al., 2009). For example, given a crossover of 4.3, VOT step 6 would be “unvoiced” with an rVOT of 1.7, whereas VOT step 2 would be “voiced” with an rVOT of -2.3.

Second in addition to this boundary adjustment, our main analysis only included trials in which the participant's response matched their predicted response based on their estimated boundary (e.g., for an rVOT of -1, they should have selected the voiced response; for an rVOT of

---

<sup>1</sup> There were insufficient data in this shortened version of the paradigm to do this within each continuum within each subject (e.g., per condition / participant).

Supplemental Materials:

INDIVIDUAL DIFFERENCES IN SPEECH PERCEPTION FLEXIBILITY

+2, the unvoiced). Thus, any differences in eye-movements would reflect within-category sensitivity.

**S4. Detailed results for lexical gradiency VWP task**

The analysis of the lexical gradiency VWP used two models. The first model is reported in Equation (2) below and statistical results are in Table S4.1.

$$\text{Comp-Filler} \sim \text{rVOT} * \text{VASslope} + \text{PoA} * \text{Voicing} + (1|\text{subject}) + (\text{rVOT}|\text{item}) \quad (2)$$

Table S4.1. *Difference between competitor and filler looks (Comp-Filler) as predicted by rVOT, raw VAS slope, place of articulation (PoA), and voicing of target*

|               | <i>Estimate</i> | <i>S.E.</i> | <i>d.f.</i> | <i>t</i> | <i>p</i> |
|---------------|-----------------|-------------|-------------|----------|----------|
| (Intercept)   | 0.019           | 0.006       | 8           | 3.480    | .008     |
| rVOT          | 0.008           | 0.001       | 9           | 6.621    | <.001    |
| VASslope      | -0.005          | 0.003       | 251         | -1.550   | .122     |
| PoA           | -0.002          | 0.005       | 9           | -0.352   | .734     |
| Voicing       | -0.004          | 0.001       | 3233        | -4.852   | <.001    |
| rVOT*VASslope | -0.004          | 0.002       | 5871        | -2.249   | .025     |
| PoA*Voicing   | -0.006          | 0.001       | 18550       | -7.372   | <.001    |

Note: Results mentioned in the MS are highlighted

We next replicated this analysis using VAS slope after it had been residualized for the performance in the visual VAS task (Equation 3, Table S4.2).

$$\text{Comp-Filler} \sim \text{rVOT} * \text{ResVASslope} + \text{PoA} * \text{Voicing} + (1|\text{subject}) + (\text{rVOT}|\text{item}) \quad (3)$$

Table S4.2 *Difference between competitor and filler looks (Comp-Filler) as predicted by rVOT, residualized VAS slope, place of articulation (PoA), and voicing of target*

|                   | <i>Estimate</i> | <i>S.E.</i> | <i>df</i> | <i>t</i> | <i>p</i> |
|-------------------|-----------------|-------------|-----------|----------|----------|
| (Intercept)       | 0.019           | 0.006       | 8.073     | 3.460    | .008     |
| rVOT              | 0.008           | 0.001       | 9.566     | 6.297    | <.001    |
| res.VASslope      | -0.002          | 0.001       | 254.8     | -1.582   | .115     |
| PoA               | -0.002          | 0.005       | 8.429     | -0.374   | .717     |
| Voicing           | -0.004          | 0.001       | 3736      | -4.808   | <.001    |
| rVOT*res.VASslope | -0.001          | 0.001       | 21420     | -1.806   | .071     |
| PoA*Voicing       | -0.006          | 0.001       | 19060     | -7.377   | <.001    |

### S5. Phoneme identification results in the EEG/ERP task

The first goal of the accuracy analysis was to validate the task (e.g., to ensure that listeners were complying with the task, the stimuli were intelligible). Given that participants vary in VOT boundary, we used place of articulation as our criterion for accuracy; if they were monitoring for a /b/ and responded “target” for anything in the d/t continuum, that response was considered incorrect. By this measure, average accuracy was high ( $M = 98.6\%$ ,  $SD = .59\%$ ) and participants responded promptly ( $M = 387^2$  ms,  $SD = 346$  ms).

Next, we examined the proportion of target responses as a function of VOT and  $F_0$ . As expected, participants were affected by both VOT and  $F_0$ ; stimuli with lower VOT/ $F_0$  values were more likely to be categorized as voiced (and vice versa; see Figure S5.1).

To test this statistically, we re-coded VOT and  $F_0$  in terms of their distance from the target (e.g., VOT step 7 was recoded as 6, when the target was voiced, and as 2, when the target

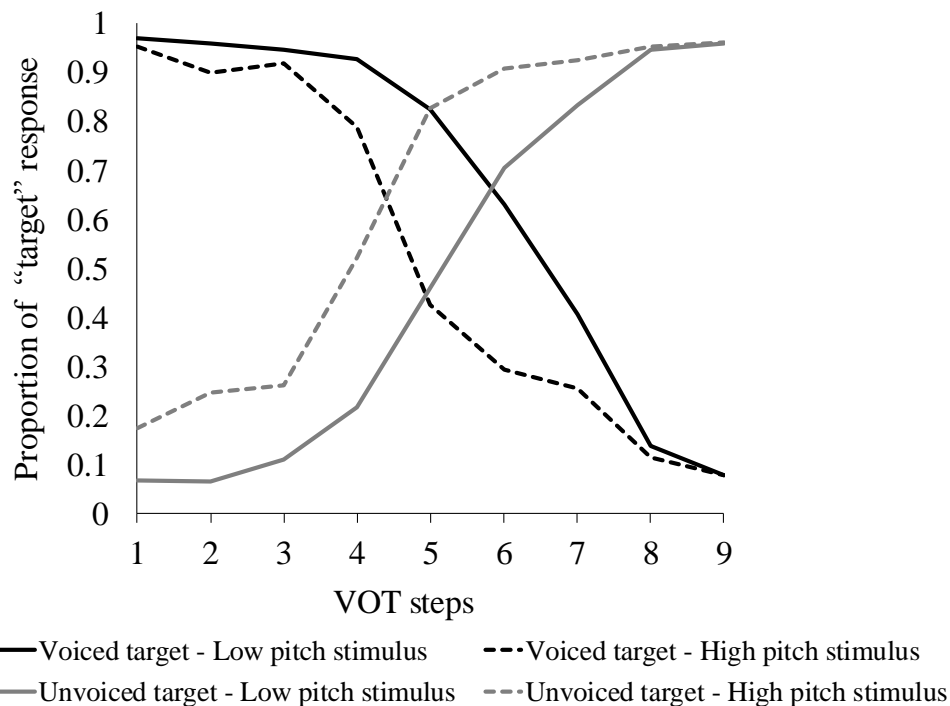

Figure S5.1. Proportion of “target” response as a function of voicing of target and VOT and  $F_0$  of the stimulus.

<sup>2</sup> As mentioned in Methods, RT was calculated starting at the onset of the prompt (i.e., they were not allowed to respond before). The prompt appeared ~200 ms after the end of the word.



Supplemental Materials:

INDIVIDUAL DIFFERENCES IN SPEECH PERCEPTION FLEXIBILITY

was unvoiced, whereas  $F_0$  was recoded as matching/mismatching with the target). We entered these recoded VOT and  $F_0$  variables (centered) and their interaction as fixed effects in a logistic mixed effects model. Place of articulation (PoA; effect-coded: alveolar = 1; labial = -1), target voicing (effect-coded: “voiced” = -1; “unvoiced” = 1), and their interaction were entered as covariates. The dependent variable was whether the participant made a “target” (coded as 1) or “other” response (coded as 0). The random effects structure included random intercepts and random VOT and  $F_0$  slopes (and their interaction) for subjects (Equation 6, results in Table S5.1).

$$P(\text{Target}) \sim \text{VOTdist} * F_0\text{dist} + \text{PoA} * \text{Voicing} + (\text{VOTdist} * F_0\text{dist} | \text{subject}), \text{family} = \text{binomial} \quad (6)$$

Table S5.1 *Probability of target response as predicted by distance from target, in VOT and  $F_0$ , place of articulation, and voicing of target*

|                     | <i>Estimate</i> | <i>S.E.</i> | <i>z(67259)</i> | <i>p</i> |
|---------------------|-----------------|-------------|-----------------|----------|
| (Intercept)         | 0.449           | 0.068       | 6.557           | .000     |
| VOTdist             | -1.029          | 0.046       | -22.255         | < .001   |
| $F_0$ dist          | -0.334          | 0.021       | -16.086         | < .001   |
| PoA                 | 0.209           | 0.012       | 17.667          | < .001   |
| Voicing             | 0.446           | 0.012       | 36.968          | < .001   |
| VOTdist* $F_0$ dist | -0.001          | 0.005       | -.174           | .862     |
| PoA*Voicing         | -0.570          | 0.012       | -46.483         | < .001   |

As shown in Table S5.1, VOT distance was significant,  $p < .001$ , as was  $F_0$  compatibility,  $p < .001$ . That is, greater VOT/ $F_0$  distance from the target predicted lower probability of a “target” response, as expected. The VOT  $\times$   $F_0$  interaction was not significant. Thus, overall, participants performed the ERP task as expected.

**S6. Detailed P3 results**

This analysis examined the P3 (average voltage within a time-window 400 to 730 ms post stimulus onset) as a function of stimulus prototypically (i.e., how target-like it was). Fixed effects included distance from the target (in VOT and  $F_0$ ), a factor reflecting whether the stimulus and the target matched in place of articulation (PoA; coded as 1 for Match and -1 for Mismatch), and all interactions. Voicing of the target was added as a covariate. Data from 5 channels were included (Pz, P7, P3, CP2, and CP1; see main text Figure 4A) and channel was treated as a random effect (see Equation 7, Table S6.1 for results).

$$P3_{amp} \sim VOTdist * F_0dist * Match + TargetVoice + (VOTdist * F_0dist | subject) + (1 | channel) \quad (7)$$

Table S6.1 *P3 amplitude as predicted by distance from the target in VOT steps (VOTdist) and  $F_0$  steps ( $F_0dist$ ), relevancy of the stimulus for the task (Match), and target voicing*

|                    | <i>Estimate</i> | <i>S.E.</i> | <i>d.f.</i> | <i>t</i> | <i>p</i> |
|--------------------|-----------------|-------------|-------------|----------|----------|
| (Intercept)        | -0.240          | 0.142       | 62          | -1.697   | .095     |
| VOTdist            | -0.025          | 0.006       | 66          | -4.062   | <.001    |
| $F_0dist$          | -0.083          | 0.026       | 66          | -3.169   | .002     |
| Match              | 0.185           | 0.007       | 47350       | 26.390   | <.001    |
| TargetVoice        | -0.005          | 0.007       | 47350       | -0.739   | .460     |
| VOTdist× $F_0dist$ | 0.005           | 0.012       | 67          | 0.456    | .650     |
| VOTdist×Match      | -0.024          | 0.003       | 47350       | -8.703   | <.001    |
| $F_0dist$ ×Match   | -0.012          | 0.014       | 47350       | -0.859   | .390     |
| VOTdist×Match      | 0.007           | 0.005       | 47350       | 1.302    | .193     |

Note: Results mentioned in the MS are highlighted

In the next analysis VAS slope was added to the fixed effects to ask whether individuals with different VAS categorization patterns showed differences in the link between VOT and N1 (see Equation 8, Table S6.2 for results).

$$P3_{amp} \sim VOTdist * F_0dist * VASslope * Match + TargetVoice + (VOTdist * F_0dist | subject) + (1 | channel) \quad (8)$$

## Supplemental Materials:

## INDIVIDUAL DIFFERENCES IN SPEECH PERCEPTION FLEXIBILITY

Table S6.2 *P3 amplitude as predicted by distance from the target in VOT steps (VOTdist) and F<sub>0</sub> steps (F<sub>0</sub>dist), relevancy of the stimulus for the task (Match), and target voicing*

|                                            | <i>Estimate</i> | <i>S.E.</i> | <i>d.f.</i> | <i>t</i> | <i>p</i> |
|--------------------------------------------|-----------------|-------------|-------------|----------|----------|
| (Intercept)                                | -0.240          | 0.141       | 61          | -1.706   | .093     |
| VOTdist                                    | -0.026          | 0.006       | 65          | -4.139   | <.001    |
| F <sub>0</sub> dist                        | -0.086          | 0.026       | 64          | -3.273   | .002     |
| VASslope                                   | 0.184           | 0.038       | 45040       | 4.824    | <.001    |
| Match                                      | 0.183           | 0.007       | 45560       | 25.727   | <.001    |
| TargetVoice                                | -0.008          | 0.007       | 45570       | -1.088   | .277     |
| VOTdist×F <sub>0</sub> dist                | 0.004           | 0.012       | 67          | 0.374    | .710     |
| VOTdist×VASslope                           | 0.047           | 0.012       | 772         | 3.815    | <.001    |
| F <sub>0</sub> dist×VASslope               | 0.037           | 0.060       | 464         | 0.612    | .541     |
| VOTdist×Match                              | -0.023          | 0.003       | 45570       | -8.333   | <.001    |
| F <sub>0</sub> dist×Match                  | -0.010          | 0.014       | 45570       | -0.722   | .470     |
| VASslope×Match                             | -0.058          | 0.023       | 45560       | -2.591   | .010     |
| VOTdist×F <sub>0</sub> dist×VASslope       | -0.024          | 0.024       | 684         | -0.999   | .318     |
| VOTdist×F <sub>0</sub> dist×Match          | 0.009           | 0.006       | 45570       | 1.574    | .115     |
| VOTdist×VASslope×Match                     | 0.028           | 0.009       | 45560       | 3.249    | .001     |
| F <sub>0</sub> dist×VASslope×Match         | 0.056           | 0.045       | 45560       | 1.244    | .213     |
| VOTdist×F <sub>0</sub> dist×VASslope×Match | 0.044           | 0.017       | 45560       | 2.499    | .012     |

Note: Results mentioned in the MS are highlighted

Next, this analysis was replicated using residualized VAS slope (see Equation 9, Table S6.3 for results).

$$P3_{amp} \sim \text{VOTdist} * \text{F}_0\text{dist} * \text{res.VASslope} * \text{Match} + \text{TargetVoice} + (\text{VOTdist} * \text{F}_0\text{dist} | \text{subject}) + (1 | \text{channel}) \quad (9)$$

## Supplemental Materials:

## INDIVIDUAL DIFFERENCES IN SPEECH PERCEPTION FLEXIBILITY

Table S6.3 *P3 amplitude as predicted by distance from the target in VOT steps (VOTdist) and F<sub>0</sub> steps (F<sub>0</sub>dist), relevancy of the stimulus for the task (Match), and target voicing*

|                                                 | <i>Estimate</i> | <i>S.E.</i> | <i>d.f.</i> | <i>t</i> | <i>p</i> |
|-------------------------------------------------|-----------------|-------------|-------------|----------|----------|
| (Intercept)                                     | -0.238          | 0.140       | 61          | -1.702   | .094     |
| VOTdist                                         | -0.025          | 0.006       | 65          | -4.118   | <.001    |
| F <sub>0</sub> dist                             | -0.085          | 0.026       | 64          | -3.245   | .002     |
| res.VASslope                                    | -0.016          | 0.014       | 44420       | -1.143   | .253     |
| Match                                           | 0.183           | 0.007       | 45560       | 25.714   | <.001    |
| TargetVoice                                     | -0.008          | 0.007       | 45570       | -1.091   | .275     |
| VOTdist×F <sub>0</sub> dist                     | 0.004           | 0.012       | 67          | 0.355    | .724     |
| VOTdist×res.VASslope                            | 0.008           | 0.004       | 535         | 1.925    | .055     |
| F <sub>0</sub> dist×res.VASslope                | 0.001           | 0.021       | 342         | 0.032    | .975     |
| VOTdist×Match                                   | -0.023          | 0.003       | 45570       | -8.331   | <.001    |
| F <sub>0</sub> dist×Match                       | -0.010          | 0.014       | 45570       | -0.729   | .466     |
| VASslope×Match                                  | -0.018          | 0.007       | 45560       | -2.351   | .019     |
| VOTdist×F <sub>0</sub> dist×res.VASslope        | -0.001          | 0.008       | 490         | -0.080   | .937     |
| VOTdist×F <sub>0</sub> dist×Match               | 0.009           | 0.006       | 45570       | 1.586    | .113     |
| VOTdist×res.VASslope ×Match                     | 0.008           | 0.003       | 45570       | 2.826    | .005     |
| F <sub>0</sub> dist×res.VASslope ×Match         | 0.026           | 0.015       | 45570       | 1.773    | .076     |
| VOTdist×F <sub>0</sub> dist×res.VASslope ×Match | 0.015           | 0.006       | 45570       | 2.621    | .009     |

Note: Results mentioned in the MS are highlighted

Supplemental Materials:  
INDIVIDUAL DIFFERENCES IN SPEECH PERCEPTION FLEXIBILITY

**S7. Detailed results for spatial Stroop task**

Table S7.1 shows results of a hierarchical regression examining the degree to which spatial Stroop performance predicts gradiency in the VAS task. Each model was done twice with raw VAS slope (left columns) and VAS slope after revisualization for the visual VAS measure (right columns).

Table S7.1. *Raw and residualized VAS slopes predicted by spatial Stroop measures*

| Step | Variable          | DV: VAS slope |              |      | DV: Residualized VAS slope |              |      |
|------|-------------------|---------------|--------------|------|----------------------------|--------------|------|
|      |                   | $\beta$       | $\Delta R^2$ | $p$  | $\beta$                    | $\Delta R^2$ | $p$  |
| 1    | Average accuracy  | -0.076        |              | .581 | -0.026                     |              | .738 |
| 1    | Average RT        | -0.040        |              | .773 | 0.001                      |              | .594 |
|      |                   |               | 0.005        | .857 |                            | 0.004        | .863 |
| 2    | Average accuracy  | -0.028        |              | .830 | 0.005                      |              |      |
| 2    | Average RT        | -0.120        |              | .397 | -0.098                     |              |      |
| 2    | Congruency effect | 0.367         |              | .004 | 0.395                      |              |      |
|      |                   |               | 0.114        | .004 |                            | 0.132        | .002 |

**S8. Complete results in the lexical inhibition VWP task**

***Mouse-Click Accuracy and RT***

Prior to the analyses, accuracy percentages were logit-transformed and RTs were log-transformed to normalize the positive-skewed distribution of the data. A one-way repeated measures ANOVA showed no effect of splicing on accuracy  $F < 1$ , which was not surprising given that responses were at ceiling (matching-splice:  $M = 99.6\%$ ,  $SD = 1.4\%$ ; nonword-splice:  $M = 99.6\%$ ,  $SD = 1.3\%$ ; word-splice:  $M = 99.6\%$ ,  $SD = 1.3\%$ ). A similar analysis of variance on RT revealed a significant splicing effect,  $F(2,140) = 63.667$ ,  $\eta^2 = .476$ ,  $p < .001$ .

Post-hoc comparisons (Bonferroni-corrected) showed that participants were slower in the competitor word-splice ( $M = 1272$  ms,  $SD = 128$  ms) compared to both the matching-splice ( $M = 1145$  ms,  $SD = 115$  ms),  $F(1,70) = 123.55$ ,  $\eta^2 = .638$ ,  $p < .001$ , and the control/nonword-splice ( $M = 1231$  ms,  $SD = 125$ ) condition,  $F(1,70) = 11.12$ ,  $\eta^2 = .137$ ,  $p < .001$ . The splicing effect on RT offers preliminary evidence that competitor activation in the word-splice condition slowed down target activation.

Table S8.1. *Subphonemic splicing effect on accuracy and reaction times*

| Predictor                         | Sum of Squares | <i>d.f.</i> | Mean Square | <i>F</i> | <i>p</i> | partial <i>r</i> |
|-----------------------------------|----------------|-------------|-------------|----------|----------|------------------|
| Dependent variable: Accuracy      |                |             |             |          |          |                  |
| Splicing                          | 0.056          | 2           | .028        | .155     | .856     | .00              |
| Error                             | 25.334         | 140         | .181        |          |          |                  |
| Dependent variable: Reaction Time |                |             |             |          |          |                  |
| Splicing                          | 0.078          | 2           | .039        | 63.667   | <.001    | .47              |
| Error                             | 0.085          | 140         | .001        |          |          |                  |

Table S8.2. *Splice effect on RT: Post-hoc comparisons (Bonferroni-corrected)*

| Comparison         |                    | <i>Mean Difference</i> | <i>S.E.</i> | <i>F</i> | <i>p</i> | partial <i>r</i> |
|--------------------|--------------------|------------------------|-------------|----------|----------|------------------|
| <i>Condition 1</i> | <i>Condition 2</i> |                        |             |          |          |                  |
| Matching-splice    | - Word-splice      | -.046                  | .004        | 123.549  | <.001    | .63              |
| Nonword-splice     | - Word-splice      | -.014                  | .004        | 11.120   | .001     | .13              |

Supplemental Materials:  
INDIVIDUAL DIFFERENCES IN SPEECH PERCEPTION FLEXIBILITY

**Fixations**

Fixations to the target (area under the curve 600 to 1600) were analyzed with a linear mixed effects model with Splice condition and VAS slope as fixed effects. Splice condition was coded as two contrasts, one contrasting the matching-splice and nonword-splice conditions, and one capturing the nonword-splice vs. word-splice condition (the effect of lexical inhibition). See Equation 10, and Table S8.3 for complete results).

$$\text{Target Looks} \sim ([ne_{i,t} \text{ vs. } ne_{p,t}] + [ne_{p,t} \text{ vs. } ne_{ck,t}]) * \text{res.VAS slope} + (1|\text{subject}) + (1|\text{item}) \quad (10)$$

This analysis was replicated using residualized VAS slope (Equation 11, Table S8.4)

$$\text{Target Looks} \sim ([ne_{i,t} \text{ vs. } ne_{p,t}] + [ne_{p,t} \text{ vs. } ne_{ck,t}]) * \text{res.VAS slope} + (1|\text{subject}) + (1|\text{item}) \quad (11)$$

Table S8.3. *Proportion of looks to the target as predicted by splice condition and VAS slope*

|                                                           | <i>Estimate</i> | <i>S.E.</i> | <i>df</i> | <i>t</i> | <i>p</i> |
|-----------------------------------------------------------|-----------------|-------------|-----------|----------|----------|
| (Intercept)                                               | 2.512           | 0.193       | 58.947    | 13.034   | < .001   |
| <i>ne<sub>i,t</sub> vs ne<sub>p,t</sub></i>               | -1.055          | 0.136       | 4685.085  | -7.779   | < .001   |
| <i>ne<sub>p,t</sub> vs ne<sub>ck,t</sub></i>              | -0.678          | 0.136       | 4685.112  | -5.002   | < .001   |
| VASslope                                                  | 0.857           | 0.555       | 54.985    | 1.543    | .128     |
| <i>[ne<sub>i,t</sub> vs ne<sub>p,t</sub>] × VASslope</i>  | -0.470          | 0.569       | 4685.066  | -0.827   | .408     |
| <i>[ne<sub>p,t</sub> vs ne<sub>ck,t</sub>] × VASslope</i> | 0.085           | 0.568       | 4685.064  | 0.150    | .881     |

Note: Results mentioned in the MS are highlighted

Table S8.4. *Proportion of looks to the target as predicted by splice condition and residualized VAS slope*

|                                                           | <i>Estimate</i> | <i>S.E.</i> | <i>df</i> | <i>t</i> | <i>p</i> |
|-----------------------------------------------------------|-----------------|-------------|-----------|----------|----------|
| (Intercept)                                               | 2.512           | 0.193       | 59.238    | 13.001   | < .001   |
| <i>ne<sub>i,t</sub> vs ne<sub>p,t</sub></i>               | -1.055          | 0.136       | 4685.083  | -7.779   | < .001   |
| <i>ne<sub>p,t</sub> vs ne<sub>ck,t</sub></i>              | -0.678          | 0.136       | 4685.110  | -5.001   | < .001   |
| res.VASslope                                              | 0.182           | 0.137       | 54.988    | 1.331    | .189     |
| <i>[ne<sub>i,t</sub> vs ne<sub>p,t</sub>] × VASslope</i>  | -0.103          | 0.139       | 4685.076  | -0.740   | .459     |
| <i>[ne<sub>p,t</sub> vs ne<sub>ck,t</sub>] × VASslope</i> | -0.037          | 0.139       | 4685.062  | -0.269   | .788     |

### S9. Detailed N1 results

#### S9.1 Modal effects

This analysis examined the N1 (average voltage within a time-window 115 to 170 ms post stimulus onset) as a function of VOT. Our goal was to replicate the analysis of Toscano et al. (2010) and extend it by adding  $F_0$  which was not manipulated in that study. Fixed effects included VOT,  $F_0$ , and their interaction as fixed effects. Place of articulation of the stimulus and the target (PoA; alveolar: 1, labial: -1) and voicing of target (unvoiced: 1, voiced: -1), and their interactions were added as covariates. Data from 12 channels were included (Cz, CP1, CP2, C3, C4, FC2, FC1, CP5, CP6, Fz, FC5, and FC6; see main text Figure 7B,C) and channel was treated as a random effect (see Equation 12, Table S9.1 for results).

$$N1_{amp} \sim VOT * F_0 + PoA * TargetVoice * TargetPoA + (VOT * F_0 | subject) + (VOT | channel) \quad (12)$$

Table S9.1. N1 amplitude as predicted by VOT,  $F_0$ , place of articulation (PoA), target voicing, and target PoA

|                           | <i>Estimate</i> | <i>S.E.</i> | <i>d.f.</i> | <i>t</i> | <i>p</i> |
|---------------------------|-----------------|-------------|-------------|----------|----------|
| (Intercept)               | -1.206          | 0.269       | 37          | -4.476   | <.001    |
| VOT                       | 0.114           | 0.014       | 43          | 8.168    | <.001    |
| $F_0$                     | 0.310           | 0.050       | 67          | 6.241    | <.001    |
| PoA                       | -0.089          | 0.007       | 114500      | -12.029  | <.001    |
| TargetVoice               | 0.034           | 0.007       | 114500      | 4.606    | <.001    |
| TargetPoA                 | 0.156           | 0.007       | 114500      | 21.143   | <.001    |
| VOT× $F_0$                | -0.040          | 0.017       | 67          | -2.314   | .024     |
| PoA×TargetVoice           | 0.013           | 0.007       | 114500      | 1.737    | .082     |
| PoA×TargetPoA             | -0.139          | 0.007       | 114500      | -18.787  | <.001    |
| TargetVoice×TargetPoA     | -0.227          | 0.007       | 114500      | -30.742  | <.001    |
| PoA×TargetVoice×TargetPoA | 0.005           | 0.007       | 114500      | 0.622    | .534     |

Note: Results mentioned in the MS are highlighted



Supplemental Materials:  
INDIVIDUAL DIFFERENCES IN SPEECH PERCEPTION FLEXIBILITY

**S9.2 Individual differences**

In the subsequent model, VAS slope (centered) was added to the fixed effects to test whether individuals with different VAS categorization patterns showed differences in the link between VOT and N1 (see Equation 13, Table S9.2 for results).

$$N1_{amp} \sim VOT * F_0 * VASslope + PoA * TargetVoice * TargetPoA + (VOT * F_0 | subject) + (VOT | channel) \quad (13)$$

Table S9.2. N1 amplitude as predicted by VOT,  $F_0$ , VAS slope, place of articulation (PoA), target voicing, and target PoA

|                                           | <i>Estimate</i> | <i>S.E.</i> | <i>d.f.</i> | <i>t</i> | <i>p</i> |
|-------------------------------------------|-----------------|-------------|-------------|----------|----------|
| (Intercept)                               | -1.204          | 0.270       | 36          | -4.453   | <.001    |
| VOT                                       | 0.111           | 0.014       | 41          | 8.062    | <.001    |
| $F_0$                                     | 0.299           | 0.051       | 66          | 5.839    | <.001    |
| VASslope                                  | -0.159          | 0.049       | 107200      | -3.282   | .001     |
| PoA                                       | -0.113          | 0.009       | 110100      | -12.248  | <.001    |
| TargetVoice                               | 0.033           | 0.008       | 110200      | 4.355    | <.001    |
| TargetPoA                                 | 0.155           | 0.008       | 110200      | 20.474   | <.001    |
| $VOT \times F_0$                          | -0.044          | 0.017       | 65.740      | -2.528   | .014     |
| $VOT \times VASslope$                     | -0.066          | 0.015       | 3456        | -4.494   | <.001    |
| $F_0 \times VASslope$                     | -0.125          | 0.075       | 2978        | -1.666   | .096     |
| $PoA \times TargetVoice$                  | 0.007           | 0.008       | 110200      | 0.948    | .343     |
| $PoA \times TargetPoA$                    | -0.142          | 0.008       | 110200      | -18.762  | <.001    |
| $TargetVoice \times TargetPoA$            | -0.231          | 0.008       | 110200      | -30.517  | <.001    |
| $VOT \times F_0 \times VASslope$          | 0.081           | 0.028       | 1892        | 2.833    | <.001    |
| $PoA \times TargetVoice \times TargetPoA$ | 0.001           | 0.008       | 110200      | 0.111    | 0.912    |

Note: Results mentioned in the MS are highlighted

Supplemental Materials:

INDIVIDUAL DIFFERENCES IN SPEECH PERCEPTION FLEXIBILITY

This analysis was replicated using residualized VAS slope (see Equation 14, Table S9.3 for results).

$$N1_{amp} \sim VOT * F_0 * \text{res.VASslope} + \text{PoA} * \text{TargetVoice} * \text{TargetPoA} + (VOT * F_0 | \text{subject}) + (VOT | \text{channel}) \quad (14)$$

Table S9.3. *N1 amplitude as predicted by VOT, F<sub>0</sub>, res.VAS slope, place of articulation (PoA), target voicing, and target PoA*

|                                  | <i>Estimate</i> | <i>S.E.</i> | <i>d.f.</i> | <i>t</i> | <i>p</i> |
|----------------------------------|-----------------|-------------|-------------|----------|----------|
| (Intercept)                      | -1.205          | 0.270       | 36          | -4.457   | <.001    |
| VOT                              | 0.110           | 0.014       | 41          | 8.024    | <.001    |
| F <sub>0</sub>                   | 0.298           | 0.051       | 66          | 5.901    | <.001    |
| res.VASslope                     | -0.059          | 0.015       | 107700      | -4.023   | <.001    |
| PoA                              | -0.098          | 0.008       | 110200      | -12.676  | <.001    |
| TargetVoice                      | 0.033           | 0.008       | 110200      | 4.362    | <.001    |
| TargetPoA                        | 0.155           | 0.008       | 110200      | 20.481   | <.001    |
| VOT×F <sub>0</sub>               | -0.043          | 0.018       | 65          | -2.454   | .017     |
| VOT×VASslope                     | -0.010          | 0.005       | 2204        | -1.884   | .060     |
| F <sub>0</sub> ×VASslope         | -0.009          | 0.027       | 1847        | -0.328   | .743     |
| PoA×TargetVoice                  | 0.007           | 0.008       | 110200      | 0.940    | .347     |
| PoA×TargetPoA                    | -0.142          | 0.008       | 110200      | -18.771  | <.001    |
| TargetVoice×TargetPoA            | -0.231          | 0.008       | 110200      | -30.508  | <.001    |
| VOT×F <sub>0</sub> ×res.VASslope | 0.046           | 0.010       | 1281        | 4.566    | .000     |
| PoA×TargetVoice×TargetPoA        | 0.001           | 0.008       | 110200      | 0.102    | .919     |

**S9.3 Testing for a categorical component in some listeners**

After establishing a basic moderation of the VOT effect by VAS gradiency we next used a series of models to ask whether less gradient listeners had a categorical component to their N1s. To do this, A *binary* variable reflecting stimulus identity (voiced/unvoiced) was entered in the models used above to ask whether a step-like function was simultaneously present along with the linear effect of VOT for some listeners. This binary variable (stepVOT) was set to -1 for VOTs below each subject's individual boundary (computed from the response functions) and +1 for VOTs above it. The model is given in Equation 15 (see Table 9.4 for results).

$$N1_{amp} \sim VOT * F_0 * VASslope + stepVOT * VASslope + PoA * Voicing + (VOT * F_0 | subject) + (VOT | channel) \quad (15)$$

Table S9.4. *N1 amplitude as a function of VOT, F<sub>0</sub>, VAS slope, stepVOT, place of articulation (PoA), target voicing, and target PoA*

|                              | <i>Estimate</i> | <i>S.E.</i> | <i>d.f.</i> | <i>t</i> | <i>p</i> |
|------------------------------|-----------------|-------------|-------------|----------|----------|
| (Intercept)                  | -1.213          | 0.270       | 36          | -4.492   | <.001    |
| VOT                          | 0.094           | 0.014       | 49          | 6.546    | <.001    |
| F <sub>0</sub>               | 0.299           | 0.051       | 66          | 5.838    | <.001    |
| VASslope                     | -0.247          | 0.050       | 107300      | -4.979   | <.001    |
| stepVOT                      | 0.053           | 0.014       | 109600      | 3.772    | <.001    |
| PoA                          | -0.117          | 0.009       | 110100      | -12.414  | <.001    |
| TargetVoice                  | 0.033           | 0.008       | 110200      | 4.350    | <.001    |
| TargetPoA                    | 0.155           | 0.008       | 110200      | 20.477   | <.001    |
| VOT×F <sub>0</sub>           | -0.044          | 0.017       | 66          | -2.530   | .014     |
| VOT×VASslope                 | -0.179          | 0.020       | 10830       | -9.167   | <.001    |
| F <sub>0</sub> ×VASslope     | -0.125          | 0.075       | 2979        | -1.669   | .095     |
| VASslope×stepVOT             | 0.366           | 0.043       | 110200      | 8.534    | <.001    |
| PoA×TargetVoice              | 0.007           | 0.008       | 110200      | 0.955    | .340     |
| PoA×TargetPoA                | -0.142          | 0.008       | 110200      | -18.766  | <.001    |
| TargetVoice×TargetPoA        | -0.231          | 0.008       | 110200      | -30.531  | <.001    |
| VOT×F <sub>0</sub> ×VASslope | 0.080           | 0.028       | 1895        | 2.825    | .005     |
| PoA×TargetVoice×TargetPoA    | 0.001           | 0.008       | 110200      | 0.122    | .903     |

Note: Results mentioned in the MS are highlighted

Supplemental Materials:

INDIVIDUAL DIFFERENCES IN SPEECH PERCEPTION FLEXIBILITY

Again, this analysis was replicated using residualized VAS slope (see Equation 16, Table S9.6 for results).

$$N1_{amp} \sim VOT * F_0 * res.VASslope + stepVOT * res.VASslope + PoA * TargetVoice * TargetPoA + (VOT * F_0 | subject) + (VOT | channel) \quad (16)$$

Table S9.5. *N1 amplitude as predicted by VOT, F<sub>0</sub>, res.VAS slope, stepVOT, place of articulation (PoA), target voicing, and target PoA*

|                                   | <i>Estimate</i> | <i>S.E.</i> | <i>d.f.</i> | <i>t</i> | <i>p</i> |
|-----------------------------------|-----------------|-------------|-------------|----------|----------|
| (Intercept)                       | -1.218          | 0.270       | 36          | -4.509   | <.001    |
| VOT                               | 0.095           | 0.014       | 49          | 6.632    | <.001    |
| F <sub>0</sub>                    | 0.298           | 0.051       | 66          | 5.900    | <.001    |
| res.VASslope                      | -0.087          | 0.015       | 107800      | -5.708   | <.001    |
| stepVOT                           | 0.049           | 0.014       | 109800      | 3.523    | <.001    |
| PoA                               | -0.102          | 0.008       | 110200      | -12.835  | <.001    |
| TargetVoice                       | 0.033           | 0.008       | 110200      | 4.363    | <.001    |
| TargetPoA                         | 0.155           | 0.008       | 110200      | 20.484   | <.001    |
| VOT×F <sub>0</sub>                | -0.043          | 0.018       | 65          | -2.455   | .017     |
| VOT×res.VASslope                  | -0.042          | 0.007       | 6244        | -6.250   | <.001    |
| F <sub>0</sub> × res.VASslope     | -0.009          | 0.027       | 1848        | -0.331   | .741     |
| res.VASslope×stepVOT              | 0.106           | 0.014       | 110200      | 7.495    | <.001    |
| PoA×TargetVoice                   | 0.007           | 0.008       | 110200      | 0.946    | .344     |
| PoA×TargetPoA                     | -0.142          | 0.008       | 110200      | -18.776  | <.001    |
| TargetVoice×TargetPoA             | -0.231          | 0.008       | 110200      | -30.516  | <.001    |
| VOT×F <sub>0</sub> × res.VASslope | 0.046           | 0.010       | 1283        | 4.561    | <.001    |
| PoA×TargetVoice×TargetPoA         | 0.001           | 0.008       | 110200      | 0.108    | .914     |

Supplemental Materials:

INDIVIDUAL DIFFERENCES IN SPEECH PERCEPTION FLEXIBILITY

In order to conduct post-hoc analyses, we split the data by participants' VAS slope (average across places of articulation) and repeated the analyses without VAS slope in the fixed effects (see Equation 17). This was done for both raw VAS slope (Table S9.6) and residualized (Table S9.7).

$$N1_{amp} \sim VOT * F_0 + stepVOT + PoA * TargetVoice * TargetPoA + (VOT * F_0 | subject) + (VOT | channel) \quad (17)$$

Table S9.6. *N1 amplitude as predicted by VOT, F<sub>0</sub>, VAS slope, stepVOT, place of articulation (PoA), target voicing, and target PoA for gradient participants only*

|                           | <i>Estimate</i> | <i>S.E.</i> | <i>d.f.</i> | <i>t</i> | <i>p</i> |
|---------------------------|-----------------|-------------|-------------|----------|----------|
| (Intercept)               | -1.038          | 0.343       | 43          | -3.031   | .004     |
| VOT                       | 0.126           | 0.020       | 48          | 6.333    | <.001    |
| F <sub>0</sub>            | 0.274           | 0.071       | 33          | 3.842    | .001     |
| stepVOT                   | -0.020          | 0.020       | 57540       | -1.041   | .298     |
| PoA                       | -0.086          | 0.011       | 57900       | -7.811   | <.001    |
| TargetVoice               | 0.029           | 0.011       | 57880       | 2.711    | .007     |
| TargetPoA                 | 0.197           | 0.011       | 57880       | 18.518   | <.001    |
| VOT×F <sub>0</sub>        | -0.048          | 0.021       | 33          | -2.294   | .028     |
| PoA×TargetVoice           | 0.006           | 0.011       | 57880       | 0.581    | .561     |
| PoA×TargetPoA             | -0.124          | 0.011       | 57880       | -11.649  | <.001    |
| TargetVoice×TargetPoA     | -0.276          | 0.011       | 57880       | -25.845  | <.001    |
| PoA×TargetVoice×TargetPoA | 0.040           | 0.011       | 57880       | 3.755    | <.001    |

Note: Results mentioned in the MS are highlighted

Table S9.7. *N1 amplitude as predicted by VOT, F<sub>0</sub>, VAS slope, stepVOT, place of articulation (PoA), target voicing, and target PoA for categorical participants only*

|                           | <i>Estimate</i> | <i>S.E.</i> | <i>d.f.</i> | <i>t</i> | <i>p</i> |
|---------------------------|-----------------|-------------|-------------|----------|----------|
| (Intercept)               | -1.404          | 0.319       | 35          | -4.397   | <.001    |
| VOT                       | 0.073           | 0.017       | 45          | 4.261    | <.001    |
| F <sub>0</sub>            | 0.346           | 0.071       | 32          | 4.911    | <.001    |
| stepVOT                   | 0.117           | 0.019       | 56540       | 6.217    | <.001    |
| PoA                       | -0.103          | 0.010       | 56550       | -9.880   | <.001    |
| TargetVoice               | 0.039           | 0.010       | 56550       | 3.830    | <.001    |
| TargetPoA                 | 0.114           | 0.010       | 56550       | 11.191   | <.001    |
| VOT×F <sub>0</sub>        | -0.031          | 0.028       | 32          | -1.109   | .276     |
| PoA×TargetVoice           | 0.020           | 0.010       | 56550       | 1.922    | .055     |
| PoA×TargetPoA             | -0.154          | 0.010       | 56550       | -15.049  | <.001    |
| TargetVoice×TargetPoA     | -0.178          | 0.010       | 56550       | -17.430  | <.001    |
| PoA×TargetVoice×TargetPoA | -0.032          | 0.010       | 56550       | -3.111   | .002     |

Note: Results mentioned in the MS are highlighted

### References

- Kapnoula, E. C., Edwards, J., & McMurray, B. (2021). Gradient activation of speech categories facilitates listeners' recovery from lexical garden paths, but not perception of speech-in-noise. *Journal of Experimental Psychology: Human Perception and Performance*.
- McMurray, B. (2017). *Nonlinear Curvefitting for Psycholinguistic (and other) Data*. <https://doi.org/none>
- McMurray, B., Farris-Trimble, A., Seedorff, M., & Rigler, H. (2016). The Effect of Residual Acoustic Hearing and Adaptation to Uncertainty on Speech Perception in Cochlear Implant Users: Evidence From Eye-Tracking. *Ear and Hearing*, 37(1), e37-51.  
<https://doi.org/10.1097/AUD.0000000000000207>
- McMurray, B., Tanenhaus, M. K., & Aslin, R. N. (2009). Within-category VOT affects recovery from lexical garden-paths: Evidence against phoneme-level inhibition. *Journal of Memory and Language*, 60(1), 132–158. <https://doi.org/10.1016/j.jml.2008.07.002>
- Toscano, J. C., McMurray, B., Dennhardt, J., & Luck, S. J. (2010). Continuous perception and graded categorization: electrophysiological evidence for a linear relationship between the acoustic signal and perceptual encoding of speech. *Psychological Science*, 21(10), 1532–1540.  
<https://doi.org/10.1177/0956797610384142>
